# Supplementary material for: Essential Roles of Exocyst Complex Component 3-like 2 on Cardiovascular Development in Mice
Source: MDPI journal article supplement (doi:10.3390/life12111730), 2022-10-28
Supplement: s1 [file s1]

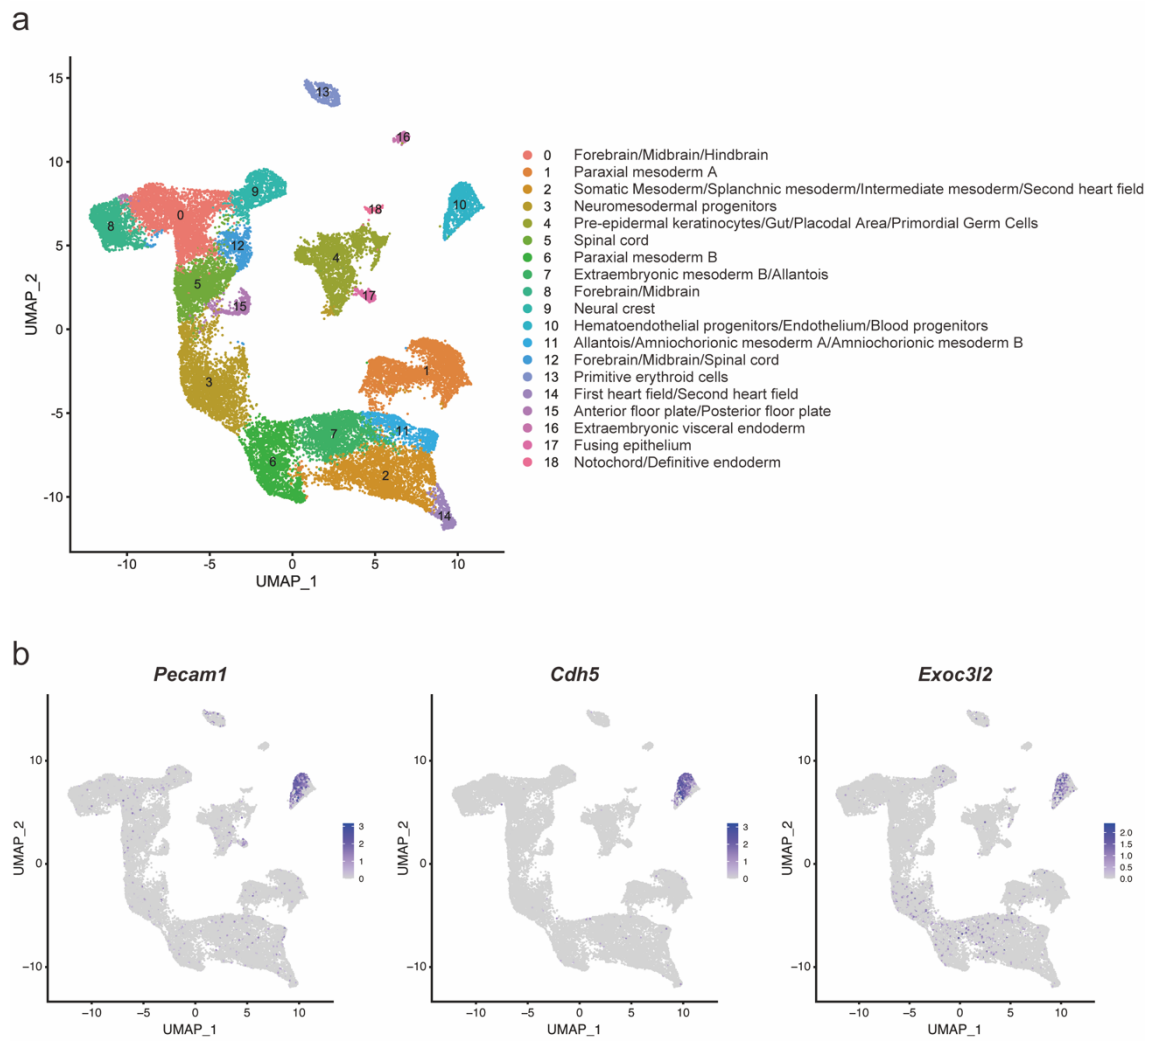

**Figure S1.**

The expression pattern of *Exoc3l2* at E8.5 mouse embryos from sc-RNA-seq data (GSE186069). **(a)** UMAP was generated using a part of E8.5 mouse embryo sc-RNA-seq dataset from GSE186069. Cluster 10 was composed of 51.0% of endothelium. **(b)** The expression levels of endothelial cell markers and *Exoc3l2*. The same UMAPs as in **a**, colored by the expression value of typical endothelial cell markers, *Pecam1* and *Cdh5*, and *Exoc3l2*.

**Supplemental Table S1: Primers for mouse genotyping PCR**

| Strain           | Allele         | Primer name                      | Primer seqnce                                     | Amplicon length                                     |
|------------------|----------------|----------------------------------|---------------------------------------------------|-----------------------------------------------------|
| Exoc3l2 eGFP KI  | WT             | 161_Exoc3l2_3'arm_Target_Forward | 5'- ATAGGATCCTTGTCCTCCCGTCCTCTCCCAACAG -3'        | 415 bp                                              |
|                  |                | 197_Exoc3l2_3'arm_Reverse2       | 5'- AACCTCCTATCCAGAAGTCGGTGTC -3'                 |                                                     |
|                  | KI             | 070_GFP-S2                       | 5'- TTCAAGGACGACGGCAACTACAAGAC -3'                | 517 bp                                              |
|                  |                | 197_Exoc3l2_3'arm_Reverse2       | 5'- AACCTCCTATCCAGAAGTCGGTGTC -3'                 |                                                     |
|                  | $\Delta$       | 159_Exoc3l2_5'arm_Target_Forward | 5'- ATAGGATCCGAAGCCTCTAATGTTTCTAAGAGTGGGACCTG -3' | 275 bp                                              |
|                  |                | 197_Exoc3l2_3'arm_Reverse2       | 5'- AACCTCCTATCCAGAAGTCGGTGTC -3'                 |                                                     |
| Exoc3l2 flox (*) | WT             | 218_Exoc3l2_flox_Cent-F          | 5'- TGCCTCTTGCTAATTATCTAACTCAGGACC -3'            | 940 bp<br>(Not digested by EcoRV)                   |
|                  |                | 219_Exoc3l2_flox_3arm-R          | 5'- TTGCTCTCTCCTTCCACCCTTCCAC -3'                 |                                                     |
|                  | flox           | 218_Exoc3l2_flox_Cent-F          | 5'- TGCCTCTTGCTAATTATCTAACTCAGGACC -3'            | 980 bp<br>(EcoRV produces 334bp + 646 bp fragments) |
|                  |                | 219_Exoc3l2_flox_3arm-R          | 5'- TTGCTCTCTCCTTCCACCCTTCCAC -3'                 |                                                     |
|                  | Exon3 $\Delta$ | 216_Exoc3l2_flox_5arm-F          | 5'- CTCTCAAACCTATGCCTCCCTTTCTACAG -3'             | 875 bp                                              |
|                  |                | 219_Exoc3l2_flox_3arm-R          | 5'- TTGCTCTCTCCTTCCACCCTTCCAC -3'                 |                                                     |

\* As for Exoc3l2 flox strain, PCR products from WT and flox alleles were distinguished by EcoRV restriction enzyme digestion.

**Supplemental Table S2: Primers for qPCR**

| Target gene | Strand  | Primer seqnce                      |
|-------------|---------|------------------------------------|
| Hprt        | Forward | 5' – TTGTTGTTGGATATGCCCTTGACTA –3' |
|             | Reverse | 5' – AGGCAGATGGCCACAGGACTA –3'     |
| Cdh5        | Forward | 5' – CCTCTGCATCCTCACCATCACAG –3'   |
|             | Reverse | 5' – ACCAACTGCTCGTGAATCTCCAG –3'   |
| Pecam1      | Forward | 5' – GCTGCTCCACTTCTGAACTCCAA –3'   |
|             | Reverse | 5' – TGGGTTTTACTGCATCATTTCCAGA –3' |
| Exoc1       | Forward | 5' – GGAGGAGAACTTACTGCAGGTGG –3'   |
|             | Reverse | 5' – CGTAACTCCAGATCCAGGGTAGC –3'   |
| Exoc2       | Forward | 5' – GCATGCAGAGGTATTCACTATTTCC –3' |
|             | Reverse | 5' – TTCTGCTGAAGGATGAGACGCAC –3'   |
| Exoc3       | Forward | 5' – CAGACGTGTGGTGGTGAATAC –3'     |
|             | Reverse | 5' – AGCCTCTCTGACCATCTTCTCGG –3'   |
| Exoc3l1     | Forward | 5' – ATTGAGTTCTGAGTTGCTAGATGGT –3' |
|             | Reverse | 5' – CTTAGGTATTGTAACACCACGGTTC –3' |
| Exoc3l2     | Forward | 5' – AGATCCTACAGTTGGAGGACACTC –3'  |
|             | Reverse | 5' – ACCACTTTCAGATAGTTCCAGGTC –3'  |
| Exoc3l3     | Forward | 5' – CCATTAAGATCGAGGTGGCCACA –3'   |
|             | Reverse | 5' – ATGCTCCTGACTTCACTGCTTGG –3'   |
| Exoc3l4     | Forward | 5' – GACACACTTCGTCCCCTCATGG –3'    |
|             | Reverse | 5' – GTATTCGCGGACCACAAAACGG –3'    |
| Exoc4       | Forward | 5' – CGGGAGGCAGACTTGGACTTTG –3'    |
|             | Reverse | 5' – GACTTCACACCCTGGTCCACC –3'     |
| Exoc5       | Forward | 5' – CGGGAGAACAAC TTGCCAATCTG –3'  |
|             | Reverse | 5' – TGCCTTTGTAAATTCAGCTCAGC –3'   |
| Exoc6       | Forward | 5' – ACATATTCGCCCAGTTCCGGAAG –3'   |
|             | Reverse | 5' – ACATACCAGTCACCAAGCCTCTG –3'   |
| Exoc6b      | Forward | 5' – GAACCCTGTGACAGCTCTGACC –3'    |
|             | Reverse | 5' – GCCACGGTGTCAATCAATTTCTGC –3'  |
| Exoc7       | Forward | 5' – GCGGCAGATGATTAAGGAACGTTTC –3' |
|             | Reverse | 5' – TCTCTGCTCTGTGTCTGGAATAGC –3'  |
| Exoc8       | Forward | 5' – AGGAGATGAAAAGTTGCGGGGTC –3'   |
|             | Reverse | 5' – CCCATAGTCTGCTTGGTGAAGGC –3'   |
